# Supplementary material
Source: publisher figshare collection journal article supplement (https://gsajournals.figshare.com/ndownloader/files/26016659)
Supplement: Supplementary file 1 [file 26016659]

## Sheet: Sheet1
		C. elegans					C. macrosperma					C. sulstoni
		Hours after plating					Hours after plating					Hours after plating
		L1 molt	L2 molt	L3 molt	L4 molt		L1 molt	L2 molt	L3 molt	L4 molt		L1 molt	L2 molt	L3 molt	L4 molt
temperature	15oC	20.5	32	44	59		n/d	n/d	n/d	n/d		50	n/d	n/d	94
	20oC	16	28	40	50		n/d	n/d	n/d	n/d		16	26	34	48
	25oC	12.5	20	31	41		16	20	24	32		10	16	22	28
	30oC	0	0	0	0		n/d	n/d	n/d	n/d		10	14	17	23
	33oC	0	0	0	0		n/d	n/d	n/d	n/d		10	14	17	23
	35oC	0	0	0	0		n/d	n/d	n/d	n/d		9	0	0	0
	n/d = not determined
